# Supplementary material for: The Carcinogenic Potential of Bisphenol A in the Liver Based on Transcriptomic Studies
Source: MDPI journal article supplement (doi:10.3390/cancers15205014), 2023-10-17
Supplement: s1 [file s1]

Table S1. The list of primers used for Real-time PCR.

| <b>Name</b>         | <b>Forward sequence: (5' to 3')</b> | <b>Reverse sequence: (5' to 3')</b> |
|---------------------|-------------------------------------|-------------------------------------|
| <b><i>INTS2</i></b> | CCTCTTGCCCTGCCTGGTGA                | GCTCTCTCCACTGCCTCCTCC               |
| <b><i>PIGN</i></b>  | TGATCCAAGCCTGTCCCTGGA               | TGAGAAACGGCCAGCCTGCA                |
| <b><i>MROH6</i></b> | GCCACTCGCGCTCTTGGAGA                | AGGCCTCCACTGTGCAGCTG                |
| <b><i>NEB</i></b>   | TGGGATCCAGCACGCCAAGG                | CCCTCCTTGGCGGCGTTGAT                |
| <b><i>GMFB</i></b>  | CCTGGTGCTGGATGAGGA                  | TGGTTAGCTCGGCAGTCTGGA<br>C          |
| <b><i>HEG1</i></b>  | CACCGTCACAACCCAGCCA                 | TCACACGTGGCTCCCTTGGC                |
| <b><i>INHBA</i></b> | CAAGGCGGCGCTTCTCAACG                | GCCACACTTCTGCACGCTCC                |
